# Supplementary material
Source: publisher figshare collection journal article supplement (https://gsajournals.figshare.com/ndownloader/files/13109795)
Supplement: Supplementary file 1 [file 13109795]

## Sheet: Sheet1
Table S8. All SNPs that were significant by either LRT-1 or CMH. The rankings are within the set of LRT-1 significant snps (column G) or CMH significnat (column H).
ns = non-significant
Chrom	snp	Ref	alt	LRT	CMH	LRT sig	CMHsig
Scf_2L	3862348	A	T	87.0692	202.492	11	14
Scf_2L	3862350	T	A	80.2666	180.101	19	21
Scf_2L	3921432	C	T	69.9398	177.959	36	24
Scf_2L	9691228	T	A	50.9827	103.339	113	154
Scf_2L	9691237	T	A	38.4292	78.9522	ns	330
Scf_2L	10641707	A	G	28.481	75.4373	ns	365
Scf_2L	10641710	G	C	34.5236	86.7943	ns	254
Scf_2L	13898087	A	T	63.327	136.225	67	67
Scf_2L	19558407	G	A	70.2008	135.077	35	69
Scf_2L	19558413	T	A	73.6998	140.437	30	57
Scf_2L	19558425	T	C	78.1449	146.674	22	51
Scf_2L	19558427	A	G	79.2558	147.7	20	49
Scf_2L	19558428	T	A	69.5371	131.331	39	72
Scf_2L	19558431	A	C	77.999	144.279	23	54
Scf_2L	19561447	G	A	26.2583	73.2281	ns	387
Scf_2L	19600742	C	T	39.5103	86.7533	ns	255
Scf_2L	19600772	T	C	51.366	118.578	109	105
Scf_2L	19600781	G	A	53.9345	117.918	93	106
Scf_2L	19600793	A	G	48.6119	110.613	129	128
Scf_2L	19600799	A	G	38.7226	88.4747	ns	240
Scf_2L	19600801	T	C	44.4088	100.865	ns	167
Scf_2L	19600805	A	G	40.9171	93.8084	ns	209
Scf_2L	19600829	A	C	37.0887	84.7165	ns	270
Scf_2L	19600831	T	C	38.0122	87.8443	ns	245
Scf_2L	19600895	T	G	35.2479	75.5754	ns	362
Scf_2L	19600898	G	A	36.5837	79.0106	ns	328
Scf_2L	19669514	G	A	40.2284	95.2294	ns	201
Scf_2L	19669526	A	C	45.3025	111.898	ns	124
Scf_2L	19672643	A	G	44.145	105.478	ns	146
Scf_2L	19881155	A	G	42.9477	89.7892	ns	227
Scf_2L	19881159	G	T	47.12	98.219	137	180
Scf_2L	19881209	A	C	36.5697	80.5757	ns	318
Scf_2L	20600714	T	A	53.296	117.878	94	107
Scf_2L	20600757	C	A	38.7472	81.2689	ns	311
Scf_2L	20610946	T	G	32.1802	73.1371	ns	391
Scf_2L	20610951	G	T	34.2154	78.037	ns	341
Scf_2L	20728668	A	G	23.1137	82.5713	ns	290
Scf_2L	20769301	A	C	37.1753	84.0989	ns	274
Scf_2L	20794689	G	A	64.6024	102.196	61	157
Scf_2L	20794693	A	G	64.7473	103.771	59	152
Scf_2L	20842479	C	G	26.311	73.4348	ns	384
Scf_2L	20842480	A	C	27.4595	76.7719	ns	353
Scf_2L	20842493	G	A	35.3477	96.7538	ns	191
Scf_2L	20842494	C	T	36.6783	99.9708	ns	173
Scf_2L	20842514	C	A	42.696	110.844	ns	127
Scf_2L	20842525	A	C	40.9264	107.65	ns	136
Scf_2L	20857498	T	C	44.2781	113.501	ns	120
Scf_2L	20863784	C	G	27.9742	73.4632	ns	383
Scf_2L	20925091	A	G	55.0684	138.635	90	61
Scf_2L	20925104	T	C	64.4925	171.616	62	32
Scf_2L	21038381	C	A	37.6617	96.3143	ns	195
Scf_2L	21050598	A	G	47.5514	130.536	134	77
Scf_2L	21050615	T	G	64.8974	164.415	58	37
Scf_2L	21113228	T	G	14.3885	76.1525	ns	357
Scf_2L	21192901	T	A	59.7303	138.521	78	63
Scf_2L	21351510	A	G	35.3574	83.9467	ns	276
Scf_2L	21430148	G	T	48.906	116.322	128	110
Scf_2L	21552967	G	T	38.5142	90.3727	ns	225
Scf_2L	21552979	G	T	36.7165	86.9751	ns	253
Scf_2L	21552984	A	T	36.2286	85.3549	ns	269
Scf_2L	21552987	A	G	36.2755	85.7684	ns	265
Scf_2L	21562005	T	A	60.9512	130.92	73	76
Scf_2L	21589185	A	T	49.8969	100.114	122	171
Scf_2L	21742342	T	C	53.0573	123.328	95	91
Scf_2L	21742348	A	G	65.1431	176.19	57	28
Scf_2L	21742387	A	T	31.6618	78.8179	ns	331
Scf_2L	21766483	A	T	66.7479	151.074	51	42
Scf_2L	22052240	G	T	65.7435	173.899	53	29
Scf_2L	22052252	A	T	67.8474	176.541	46	27
Scf_2L	22110334	T	C	45.8916	123.69	ns	89
Scf_2L	22110364	C	T	41.2886	98.171	ns	181
Scf_2L	22110370	A	G	67.5556	177.818	48	25
Scf_2L	22120291	C	T	34.6404	79.8745	ns	324
Scf_2L	22120292	G	C	36.0144	82.3524	ns	294
Scf_2L	22144010	A	T	39.8178	95.7277	ns	198
Scf_2L	22152863	A	C	40.1661	87.8727	ns	244
Scf_2L	22158457	G	C	31.7855	79.434	ns	326
Scf_2L	22181460	A	G	62.384	121.851	70	98
Scf_2L	22339369	G	A	51.7229	123.618	104	90
Scf_2L	22356357	A	G	46.9473	82.4571	ns	292
Scf_2L	22356363	A	C	47.5759	88.9568	133	235
Scf_2L	22356383	T	C	38.8709	82.0105	ns	299
Scf_2L	22374940	A	T	82.4093	204.06	14	13
Scf_2L	22855614	C	A	35.1285	75.5014	ns	363
Scf_2L	22879142	C	G	29.38	96.3321	ns	194
Scf_2L	22897772	T	A	35.9361	81.3032	ns	310
Scf_2L	22903386	G	T	33.4233	80.7593	ns	317
Scf_2L	22980370	C	T	32.1769	76.1555	ns	356
Scf_2L	22980400	T	C	45.0556	111.007	ns	126
Scf_2L	22980409	G	A	42.1344	100.295	ns	170
Scf_2L	22980421	A	G	42.1694	101.516	ns	161
Scf_2L	22980429	T	C	32.8507	79.6804	ns	325
Scf_2L	22980433	A	G	33.6236	81.0782	ns	314
Scf_2L	22980457	A	C	34.7199	82.9059	ns	288
Scf_2L	22980459	T	C	31.6015	77.6975	ns	343
Scf_2L	22980523	T	G	33.5579	75.1444	ns	367
Scf_2L	22980526	G	A	33.7274	74.9089	ns	368
Scf_2L	22980544	T	G	32.9877	76.7907	ns	352
Scf_2L	22980550	C	T	38.6413	88.0992	ns	242
Scf_2L	22980556	T	C	37.9664	85.3904	ns	268
Scf_2L	22980562	G	A	35.9404	83.3467	ns	282
Scf_2L	22980577	A	G	32.2111	74.6049	ns	373
Scf_2L	23056889	C	G	44.1718	99.8024	ns	175
Scf_2L	23056890	G	A	44.8403	101.494	ns	162
Scf_2L	23357534	A	G	58.2785	113.138	84	122
Scf_2L	23371901	G	C	38.2753	83.6146	ns	279
Scf_2R	96551	A	G	36.1598	71.9274	ns	399
Scf_2R	115709	A	T	58.2473	172.066	85	31
Scf_2R	330651	G	T	35.3374	89.6444	ns	229
Scf_2R	330873	T	A	52.7609	138.528	97	62
Scf_2R	751676	T	C	34.0437	81.8964	ns	300
Scf_2R	751684	C	G	49.4198	117.708	124	108
Scf_2R	751687	G	A	48.4043	115.875	130	112
Scf_2R	751692	A	G	51.5003	120.276	108	101
Scf_2R	752620	T	A	42.4408	94.9002	ns	202
Scf_2R	752624	C	G	31.9034	74.7142	ns	371
Scf_2R	752637	T	G	43.8768	96.0408	ns	197
Scf_2R	752645	C	A	50.5044	113.33	117	121
Scf_2R	764387	C	G	39.7638	101.011	ns	165
Scf_2R	767165	C	T	40.076	91.3946	ns	221
Scf_2R	767179	G	T	39.0818	94.3043	ns	203
Scf_2R	793582	T	A	33.6289	97.8904	ns	185
Scf_2R	793597	C	T	41.4791	105.268	ns	147
Scf_2R	800438	T	A	36.5072	107.004	ns	138
Scf_2R	851594	A	G	51.5431	119.964	107	103
Scf_2R	851622	T	A	77.9614	186.601	24	18
Scf_2R	991940	G	A	25.7661	73.3864	ns	385
Scf_2R	1090092	A	G	51.2152	103.96	111	151
Scf_2R	1220877	A	T	44.0358	87.1047	ns	252
Scf_2R	1356518	C	A	39.238	80.2021	ns	321
Scf_2R	1357032	A	T	55.535	114.904	89	114
Scf_2R	1357040	C	T	54.687	114.618	91	115
Scf_2R	1357048	T	G	51.3648	106.845	110	140
Scf_2R	1357053	T	C	50.3097	103.119	119	156
Scf_2R	1357055	C	T	43.9571	89.8889	ns	226
Scf_2R	1357058	G	A	39.0047	81.4334	ns	308
Scf_2R	1357066	A	G	45.7451	93.7231	ns	210
Scf_2R	1444639	C	A	52.0348	140.296	101	58
Scf_2R	1475196	A	G	40.4083	93.8301	ns	208
Scf_2R	1580150	A	G	43.3009	87.6115	ns	248
Scf_2R	1675896	A	T	65.673	148.181	54	45
Scf_2R	1675906	A	T	59.3613	135.662	79	68
Scf_2R	1675907	C	T	58.6748	134.209	81	70
Scf_2R	1684137	G	T	28.332	78.5726	ns	335
Scf_2R	1684140	T	A	29.081	80.7688	ns	316
Scf_2R	1695491	T	A	27.8486	77.8711	ns	342
Scf_2R	1774017	C	G	51.8715	131.299	102	73
Scf_2R	1780791	C	T	52.3224	149.343	100	43
Scf_2R	1783066	G	C	41.0979	87.163	ns	251
Scf_2R	1841602	T	C	67.1968	148.046	50	47
Scf_2R	1857855	A	G	43.3878	91.4224	ns	220
Scf_2R	1881084	A	T	28.3197	73.1832	ns	390
Scf_2R	1885016	G	A	37.7479	105.165	ns	148
Scf_2R	1885031	A	T	31.2903	77.0662	ns	349
Scf_2R	1885043	A	T	34.521	87.983	ns	243
Scf_2R	1885044	T	C	28.713	76.1398	ns	359
Scf_2R	1885048	T	A	29.7814	81.6653	ns	304
Scf_2R	1915106	G	T	63.39	139.155	65	60
Scf_2R	1974271	T	A	46.1923	83.1078	ns	285
Scf_2R	1981750	G	A	41.0446	89.2622	ns	231
Scf_2R	2042041	A	G	35.5613	81.6791	ns	303
Scf_2R	2063372	A	G	29.019	75.6125	ns	361
Scf_2R	2063384	G	A	30.551	81.7235	ns	302
Scf_2R	2189686	A	G	28.5848	82.938	ns	286
Scf_2R	2404114	G	A	50.3828	119.854	118	104
Scf_2R	2429567	A	C	38.8257	97.7367	ns	186
Scf_2R	2453379	A	G	62.9932	148.116	68	46
Scf_2R	2567809	T	C	62.184	144.323	71	53
Scf_2R	2644286	T	A	32.169	82.1559	ns	296
Scf_2R	2644301	C	G	41.8505	93.1534	ns	214
Scf_2R	2644322	C	T	37.4674	83.7056	ns	278
Scf_2R	2781587	A	T	29.4867	71.9184	ns	400
Scf_2R	3142727	C	T	32.6926	80.3303	ns	319
Scf_2R	3195097	C	T	116.313	273.645	3	3
Scf_2R	3195101	A	G	113.867	263.186	4	4
Scf_2R	3196787	G	A	37.6499	74.5274	ns	374
Scf_2R	3197797	C	T	31.0657	89.7842	ns	228
Scf_2R	3197805	T	C	30.5938	85.8242	ns	264
Scf_2R	3197807	G	A	32.1791	95.3156	ns	200
Scf_2R	3197809	T	A	33.2878	99.4192	ns	176
Scf_2R	3197961	A	T	68.3825	148.014	44	48
Scf_2R	3205249	T	G	49.0944	101.096	127	164
Scf_2R	3205252	A	T	45.7129	107.433	ns	137
Scf_2R	3205256	G	C	30.6977	74.4481	ns	376
Scf_2R	3205272	A	C	56.2782	127.92	86	81
Scf_2R	3470273	T	G	44.9481	122.005	ns	97
Scf_2R	3470544	C	T	43.4952	115.221	ns	113
Scf_2R	4630618	G	A	40.3015	78.0393	ns	340
Scf_2R	6076710	A	G	37.8193	80.2636	ns	320
Scf_2R	6635052	T	G	140.876	348.548	2	1
Scf_2R	10209531	A	C	58.2904	126.14	83	84
Scf_2R	10209537	T	C	41.9439	92.487	ns	217
Scf_2R	10209545	T	C	33.0971	72.9845	ns	393
Scf_2R	12390230	A	C	41.5792	94.1622	ns	205
Scf_2R	12937703	A	C	37.8313	93.1746	ns	213
Scf_2R	12942082	C	A	102.544	224.37	6	8
Scf_2R	12942083	T	G	100.594	213.493	7	10
Scf_2R	12942094	G	C	104.611	228.89	5	7
Scf_2R	13367459	G	T	31.5884	73.6796	ns	381
Scf_2R	13367466	A	T	38.6115	94.2154	ns	204
Scf_2R	13367476	G	A	38.7634	83.9376	ns	277
Scf_2R	15248177	T	A	52.6891	131.018	99	75
Scf_2R	18879292	C	T	27.1238	73.3682	ns	386
Scf_2R	21462376	C	G	46.2216	122.053	ns	96
Scf_2R	21485529	G	A	31.8047	80.1747	ns	322
Scf_2R	21485533	C	A	31.3229	78.756	ns	333
Scf_3L	1200893	G	C	26.0603	76.4405	ns	355
Scf_3L	1200894	T	A	27.4014	81.5483	ns	305
Scf_3L	4223356	G	C	69.8493	213.364	38	11
Scf_3L	6052504	G	T	74.5547	185.608	28	19
Scf_3L	6210362	A	T	32.0697	82.0248	ns	298
Scf_3L	7586779	G	A	25.8019	76.5325	ns	354
Scf_3L	7862072	T	C	50.7466	141.252	115	56
Scf_3L	9205528	G	A	44.7873	72.1122	ns	398
Scf_3L	9206753	A	T	29.5657	74.1562	ns	378
Scf_3L	9206980	G	T	50.0898	58.0673	121	ns
Scf_3L	9223536	T	A	41.2352	83.3865	ns	281
Scf_3L	11278353	C	T	58.642	139.8	82	59
Scf_3L	11278359	C	G	68.0781	154.343	45	41
Scf_3L	11278362	A	T	64.6513	145.295	60	52
Scf_3L	11283847	G	A	40.7621	94.0822	ns	207
Scf_3L	11727291	C	T	29.0011	83.9567	ns	275
Scf_3L	12027452	G	A	28.5384	77.2912	ns	347
Scf_3L	13410210	A	C	34.3358	97.0455	ns	190
Scf_3L	18123595	C	A	29.2022	80.8068	ns	315
Scf_3L	18123631	A	G	24.4454	72.9905	ns	392
Scf_3L	19518026	T	C	27.5739	86.5026	ns	257
Scf_3L	19679880	A	G	26.7806	74.7032	ns	372
Scf_3L	19798532	T	C	30.1634	84.5384	ns	271
Scf_3L	19798552	C	T	41.6308	127.855	ns	82
Scf_3L	19799254	C	T	25.868	72.4436	ns	395
Scf_3L	21918821	T	C	22.4945	74.2178	ns	377
Scf_3L	22156865	G	T	23.2016	77.6135	ns	345
Scf_3L	22195294	A	T	25.8598	77.5641	ns	346
Scf_3L	22342791	C	G	46.1264	125.131	ns	87
Scf_3L	22380573	C	T	28.3607	85.9338	ns	263
Scf_3L	22380581	C	A	32.8868	101.862	ns	159
Scf_3L	22604813	C	T	40.6345	96.6332	ns	192
Scf_3L	23030585	T	A	47.51	131.969	135	71
Scf_3L	23030605	C	T	30.3872	81.3134	ns	309
Scf_3L	23052836	T	G	41.7143	100.867	ns	166
Scf_3L	23052839	G	A	42.203	100.79	ns	168
Scf_3L	23060442	A	T	29.374	79.8757	ns	323
Scf_3L	23060445	C	T	28.3727	78.7029	ns	334
Scf_3L	23060465	C	T	26.0096	74.7957	ns	370
Scf_3L	23103248	A	G	31.4664	76.1477	ns	358
Scf_3L	23106844	A	G	31.4086	82.57	ns	291
Scf_3L	23161028	C	G	54.4016	177.072	92	26
Scf_3L	23251586	T	A	29.3687	78.953	ns	329
Scf_3L	23251592	G	A	43.4768	109.472	ns	132
Scf_3L	23251602	G	A	35.2852	88.7196	ns	238
Scf_3L	23397111	A	C	67.6181	163.87	47	38
Scf_3L	23403223	T	G	80.8561	212.35	16	12
Scf_3L	23403227	A	T	65.8495	168.217	52	34
Scf_3L	23412510	A	T	78.5327	172.448	21	30
Scf_3L	23412516	A	G	81.0962	179.454	15	22
Scf_3L	23412522	T	G	60.2808	125.745	77	86
Scf_3L	23551683	A	G	36.8928	87.6945	ns	246
Scf_3L	23554891	G	A	30.0443	85.9848	ns	262
Scf_3L	23554918	C	T	31.4822	82.73	ns	289
Scf_3L	23554921	T	G	37.275	95.5818	ns	199
Scf_3L	23579039	G	T	50.2769	124.898	120	88
Scf_3L	23694953	T	C	30.3301	79.2518	ns	327
Scf_3L	23694956	T	C	31.6605	81.8793	ns	301
Scf_3L	23694968	C	T	34.5452	90.9514	ns	224
Scf_3L	23694974	A	G	30.9488	78.7898	ns	332
Scf_3L	23694980	G	A	32.1171	82.935	ns	287
Scf_3L	23694986	A	C	34.5941	88.2953	ns	241
Scf_3L	23695076	T	C	37.3091	110.379	ns	129
Scf_3L	23695097	T	C	41.1555	120.512	ns	99
Scf_3L	23695101	A	G	42.3541	122.392	ns	95
Scf_3L	23695103	T	C	38.6513	112.987	ns	123
Scf_3L	23695121	C	T	35.914	109.143	ns	133
Scf_3L	23710611	T	C	28.5101	86.2436	ns	260
Scf_3L	23736027	G	A	22.9584	83.1545	ns	284
Scf_3L	23752401	A	G	71.6947	184.295	33	20
Scf_3L	23752413	A	T	76.0806	194.81	26	16
Scf_3L	23752433	T	C	68.5928	167.864	42	35
Scf_3L	23753670	C	T	39.633	97.5351	ns	188
Scf_3L	23761617	G	C	51.6913	141.357	105	55
Scf_3L	23761623	C	A	40.3458	122.78	ns	94
Scf_3L	23761627	C	A	41.613	126.565	ns	83
Scf_3L	23963028	T	A	23.7579	72.5988	ns	394
Scf_3L	24056190	G	T	51.5707	146.964	106	50
Scf_3L	24056227	T	G	39.6639	105.652	ns	145
Scf_3L	24077205	A	G	24.1577	84.2089	ns	273
Scf_3L	24102279	A	G	33.8142	96.6158	ns	193
Scf_3R	158561	G	A	36.4387	107.788	ns	135
Scf_3R	158563	T	A	39.5451	128.897	ns	80
Scf_3R	367845	T	C	47.3411	98.0313	136	183
Scf_3R	3203011	A	T	20.3162	78.4751	ns	336
Scf_3R	3203014	T	C	21.3969	81.1982	ns	313
Scf_3R	3203027	G	A	33.2528	114.515	ns	116
Scf_3R	3203055	A	G	31.4652	97.5293	ns	189
Scf_3R	3203084	C	T	29.5915	98.9852	ns	178
Scf_3R	4530272	A	C	33.8955	78.1378	ns	339
Scf_3R	4530274	C	T	23.4301	71.544	ns	401
Scf_3R	8013505	C	T	31.6416	94.1322	ns	206
Scf_3R	10758316	G	T	32.6169	82.3855	ns	293
Scf_3R	10758319	A	G	34.5134	87.6428	ns	247
Scf_3R	11766158	G	A	80.5064	236.31	17	5
Scf_3R	11766194	G	A	44.6226	137.14	ns	64
Scf_3R	11766196	A	T	41.4383	122.903	ns	93
Scf_3R	12023962	C	T	31.6416	73.2179	ns	388
Scf_3R	12023963	C	T	31.7659	73.5447	ns	382
Scf_3R	14055827	G	A	47.8068	109.989	131	130
Scf_3R	15971225	T	A	87.4141	148.284	10	44
Scf_3R	16961782	T	A	161.565	230.139	1	6
Scf_3R	18966393	T	A	50.9146	116.234	114	111
Scf_3R	19637454	G	A	40.3032	89.1437	ns	234
Scf_3R	22608914	G	A	80.4601	196.444	18	15
Scf_3R	22628221	A	G	41.8643	74.459	ns	375
Scf_3R	22628223	A	G	39.6521	72.3509	ns	397
Scf_3R	23075495	A	C	65.3929	169.95	56	33
Scf_X	7541	C	A	69.2839	137.056	40	65
Scf_X	9614	C	A	40.6073	78.4309	ns	338
Scf_X	9627	A	T	46.2877	86.4503	ns	258
Scf_X	9823	A	G	40.8952	85.5954	ns	267
Scf_X	820989	T	C	72.8366	131.153	31	74
Scf_X	2825727	T	G	60.8955	116.575	74	109
Scf_X	3094159	C	T	74.6253	113.95	27	119
Scf_X	3094187	A	T	56.1575	93.4385	88	211
Scf_X	3860136	T	A	93.3153	178.279	9	23
Scf_X	4273220	T	A	63.3328	93.2157	66	212
Scf_X	4273222	T	A	65.4423	97.5914	55	187
Scf_X	4273224	T	C	62.7829	91.3631	69	222
Scf_X	4273251	T	A	68.4304	104.475	43	149
Scf_X	4273261	G	T	67.34	101.268	49	163
Scf_X	4273268	G	A	70.4439	106.864	34	139
Scf_X	6104301	A	G	43.5518	88.9225	ns	236
Scf_X	6104316	A	G	38.3682	89.374	ns	230
Scf_X	6242717	G	A	39.6197	78.4567	ns	337
Scf_X	6405547	G	A	37.9889	87.2004	ns	250
Scf_X	6405550	G	C	35.9652	83.2196	ns	283
Scf_X	6405554	T	G	37.4174	85.9909	ns	261
Scf_X	6405561	C	G	36.3259	82.3465	ns	295
Scf_X	7872843	T	A	49.3624	106.302	125	143
Scf_X	9051641	G	T	86.7074	161.07	12	39
Scf_X	9051678	A	C	56.2644	98.9842	87	179
Scf_X	9051686	A	G	60.7657	103.389	75	153
Scf_X	9051688	T	A	58.7209	99.9986	80	172
Scf_X	9695824	A	T	34.2302	75.4402	ns	364
Scf_X	9695826	A	C	45.7278	99.0901	ns	177
Scf_X	9703234	T	C	28.112	91.622	ns	219
Scf_X	10259867	G	C	45.5885	76.1168	ns	360
Scf_X	10550413	A	G	49.3122	108.204	126	134
Scf_X	11357723	T	G	51.8007	111.151	103	125
Scf_X	11953174	G	A	30.4446	88.8123	ns	237
Scf_X	11953189	G	T	31.8974	86.5228	ns	256
Scf_X	13340793	A	G	38.3918	81.2573	ns	312
Scf_X	13340839	T	A	36.2808	75.2402	ns	366
Scf_X	13340846	A	T	49.5632	106.064	123	144
Scf_X	13340849	G	C	51.1568	109.886	112	131
Scf_X	13844036	G	T	64.2204	129.355	63	79
Scf_X	13844041	T	C	61.6166	125.807	72	85
Scf_X	14705755	T	G	36.562	87.5155	ns	249
Scf_X	14705758	T	C	35.9745	86.2623	ns	259
Scf_X	14705766	A	T	37.162	92.9181	ns	215
Scf_X	14713468	T	C	60.6354	114.487	76	117
Scf_X	15003537	T	A	76.4818	136.822	25	66
Scf_X	16106571	C	G	74.3417	187.88	29	17
Scf_X	16106745	C	A	84.5874	214.018	13	9
Scf_X	16277078	A	G	40.803	114.167	ns	118
Scf_X	16277095	C	T	94.5853	277.804	8	2
Scf_X	16291700	A	G	50.6108	101.901	116	158
Scf_X	16291875	T	C	63.5963	129.479	64	78
Scf_X	16292310	C	T	47.0489	101.731	138	160
Scf_X	16292314	C	T	44.8269	98.1661	ns	182
Scf_X	17401461	A	G	68.795	92.363	41	218
Scf_X	18210691	C	T	42.1086	96.1531	ns	196
Scf_X	18210697	C	T	36.0935	76.9954	ns	350
Scf_X	18683188	A	C	31.0354	81.5298	ns	306
Scf_X	19622162	G	C	69.8878	164.743	37	36
Scf_X	19622170	C	T	27.5922	77.6464	ns	344
Scf_X	20025855	T	A	44.8823	103.309	ns	155
Scf_X	20166109	T	C	45.3552	106.806	ns	141
Scf_X	20166130	G	A	38.8583	84.4809	ns	272
Scf_X	20186557	T	G	37.4119	74.8641	ns	369
Scf_X	20248063	T	G	31.0066	71.516	ns	402
Scf_X	20248093	T	C	47.7391	120.2	132	102
Scf_X	20272104	G	A	40.7019	89.1929	ns	232
Scf_X	20272116	A	G	39.4976	89.1813	ns	233
Scf_X	20272122	A	G	39.104	85.643	ns	266
Scf_X	20272124	T	C	39.3104	88.5379	ns	239
Scf_X	20272128	A	G	41.5448	92.5402	ns	216
Scf_X	20272137	C	T	41.0637	91.267	ns	223
Scf_X	20272152	A	C	34.1718	72.41	ns	396
Scf_X	20272218	T	G	41.6183	76.8858	ns	351
Scf_X	20272221	G	A	44.7102	81.4846	ns	307
Scf_X	20272257	G	A	40.363	73.8492	ns	380
Scf_X	20300940	G	A	39.8527	100.315	ns	169
Scf_X	20390489	C	T	36.5635	82.1447	ns	297
Scf_X	20524547	T	C	30.3064	73.8927	ns	379
Scf_X	20524560	C	T	31.1083	73.1905	ns	389
Scf_X	20561008	T	A	71.9036	159.783	32	40
Scf_X	20583572	A	T	52.783	120.496	96	100
Scf_X	20583610	A	T	31.057	77.1898	ns	348
Scf_X	20689314	T	A	40.8338	106.778	ns	142
Scf_X	20748053	A	T	41.1898	99.8396	ns	174
Scf_X	20748096	G	A	44.0866	104.15	ns	150
Scf_X	20748124	C	T	45.3565	97.99	ns	184
Scf_X	20767913	A	T	33.0956	83.4464	ns	280
Scf_X	20789264	A	C	52.7281	122.992	98	92
